# Supplementary material for: The Role of Telocytes and Telocyte-Derived Exosomes in the Development of Thoracic Aortic Aneurysm
Source: MDPI journal article supplement (doi:10.3390/ijms23094730), 2022-04-25
Supplement: s1 [file s1]

## Supplemental Information

Supplement Table S1. List of antibodies and working dilutions used in this study.

| Antibody name                      | Source           | Cat.no°  | Working Dilution<br>WB | Working Dilution<br>ICC | Working Dilution<br>IF |
|------------------------------------|------------------|----------|------------------------|-------------------------|------------------------|
| <i><u>Primary Antibodies</u></i>   |                  |          |                        |                         |                        |
| SM-calponin                        | Abcam            | Ab78491  | 1:400                  | 1:250                   | 1:100                  |
| ACTB                               | SantaCruz        | sc47778  | 1:500                  | -                       | -                      |
| ckit/CD117                         | Abcam            | ab32363  | 1:200                  | 1:200                   | 4.72µg/ml              |
| PDGFR- $\alpha$                    | SantaCruz        | sc398206 | 1:400                  | 1:100                   | 1:100                  |
| PDGFR- $\beta$                     | Abcam            | ab69506  | 1:600                  | 1:300                   | 1:300                  |
| KLF-4                              | Abcam            | ab75486  | 1:50                   | 1:50                    | 10µg/ml                |
| VEGF-A                             | Abcam            | ab1316   | 1:100                  | 1:100                   | 1:100                  |
| $\alpha$ SMC                       | Abcam            | ab5694   | 1:500                  | 1:500                   | 1:500                  |
| Vimentin                           | SantaCruz        | sc5565   | 1:200                  | 1:200                   | 1µg/ml                 |
| CD133 (EPR20980-104)               | Abcam            | ab216323 | 1:600                  | 1:1000                  | 1:1000                 |
| CD63                               | Abcam            | ab68418  | 1:750                  | -                       | -                      |
| Integrin $\beta$ -1 (CD29)         | Abcam            | Ab183666 | 1:400                  | 1:200                   | -                      |
| HSP90                              | CellSignaling    | 7874S    | 1:800                  | -                       | -                      |
| CD34 (B6)                          | SantaCruz        | sc74499  | 1:400                  | 1:50                    | 4µg/ml                 |
| TSG101                             | SantaCruz        | sc7974   | 1:500                  | -                       | -                      |
| <i><u>Secondary Antibodies</u></i> |                  |          |                        |                         |                        |
| AF488GAR                           | molecular probes | A11034   | -                      | 1:1000                  | 1:500                  |
| AF546GAM                           | molecular probes | A11030   | -                      | 1:1000                  | 1:1000                 |
| AF488GAM                           | molecular probes | A11029   | -                      | 1:1000                  | 1:1000                 |
| AF546GAR                           | molecular probes | A11035   | -                      | 1:1000                  | 1:1000                 |
| AF488DAG                           | molecular probes | A11055   | -                      | 1:500                   | 1:500                  |
| HRP-anti-mouse IgG                 | CellSignaling    | 7076S    | 1:2000                 | -                       | -                      |
| HRP-anti-rabbit IgG                | CellSignaling    | 7074S    | 1:3000                 | -                       | -                      |
| <i><u>Isotype-control</u></i>      |                  |          |                        |                         |                        |
|                                    | BDPharmigen      | 550878   | -                      | 4 µg/ml                 | 4 µg/ml                |
| purified mouse IgG                 | Abcam            | Ab27478  | -                      | 1.89 µg/ml              | 1.89 µg/ml             |
| purified rabbit IgG                |                  |          |                        |                         |                        |

BD Pharmigen™ (BD Biosciences), San Jose, CA; Santa Cruz Biotechnologies, Inc., TX, USA; Invitrogen Molecular Probes, ThermoFisher Scientific, Massachusetts, USA; Novus Biologics, LLC, CO, USA; Dianova GmbH, Hamburg, Germany.

**Supplement Table S2. Primer sequences for qPCR**

| Target                                 | Forward Primer                   | Reverse Primer               |
|----------------------------------------|----------------------------------|------------------------------|
| <i>miRNA primer sequences</i>          |                                  |                              |
| <i>RNU6</i>                            | CGCTTCGGCAGCACATATAC             | AGGGGCCATGCTAATCTTCT         |
| <i>SNORD44</i>                         | TGATGATAAGCAAATGCTGACTG          | GAGCTAATTAAGACCTTCATGTTTCAAG |
| <i>hsa-mir-21-5p</i>                   | GCAGTAGCTTATCAGACTGATG           | GGTCCAGTTTTTTTTTTTTTTTCAAC   |
| <i>hsa-mir-24-3p</i>                   | GATCCTGGCTCAGTTCAGCAGGAACA<br>GC | TCGAGCTGTTCTGCTGAACTGAGCCAG  |
| <i>hsa-mir-143-3p</i>                  | GCAGTGCTGCATCTCTG                | GAACATGTCTGCGTATCTC          |
| <i>hsa-mir-145-5p</i>                  | GTCCAGTTTTCCAGGA                 | GAACATGTCTGCGTATCTC          |
| <i>hsa-mir-146a</i>                    | GAGAACTGAATTCCATGG               | GAACATGTCTGCGTATCTC          |
| <i>hsa-mir-221-3p</i>                  | GCCGAGAGCTACATTGTCTG             | GTCGTATCCAGTGCAGGG           |
| <i>hsa-mir-221-5p</i>                  | TCCGCGCCCTTGCCAGACC              | GTGCCTGGTGCTCTCTTACC         |
| <i>hsa-mir-222-5p</i>                  | GGGCTCAGTAGCCAGTGTA              | CAGTGCGTGTCGTGGAGT           |
| <i>mRNA primer sequences</i>           |                                  |                              |
| <i>VIM</i>                             | AGGCAAAGCAGGAGTCCACTGA           | ATCTGGCGTTCCAGGGACTCAT       |
| <i>KLF4</i>                            | CGACGCGTGCTCCCATCTT              | GGCAGTGTTGGTTCATATCCA        |
| <i>KIT</i>                             | TCATCGAGTGTGATGGGAAA             | GGTGACTTGTTCAGGCAACA         |
| <i>MYH11</i>                           | GTCCAGGAGATGAGGCAGAAAC           | GTCTGCGTTCTCTTTCTCCAGC       |
| <i>COL1A1</i>                          | GATTCCCTGGACCTAAAGGTGC           | AGCCTCTCCATCTTTGCCAGCA       |
| <i>ACTA</i>                            | CTATGCCTCTGGACGCACAAC            | CAGATCCAGACGCATGATGGCA       |
| <i>PDGFRA</i>                          | GACTTTCGCCAAAGTGGAGGAG           | AGCCACCGTGAGTTCAGAACGC       |
| <i>PDGFRB</i>                          | AGGACAAACCGTACCTTGGGTGACT        | CAGTTCTGACACGTACCGGGTCTC     |
| <i>CNN1</i>                            | CTGGCTGCAGCTTATTGATG             | CTGAGAGAGTGGATCGAGGG         |
| <i>INTGR</i>                           | AGAAGCTCAAGCCAGAGG               | GCATCTGTGGAACACACC           |
| <i>RPLPO</i><br>(housekeeping<br>gene) | AGCCCAGAACACTGGTCTC              | ACTCAGGATTTCAATGGTGCC        |
| <i>GAPDH</i><br>(housekeeping<br>gene) | TGCACCACCAACTGCTTAGC             | GGCATGGACTGTGGTCATGAG        |

## Supplemental Figures

A

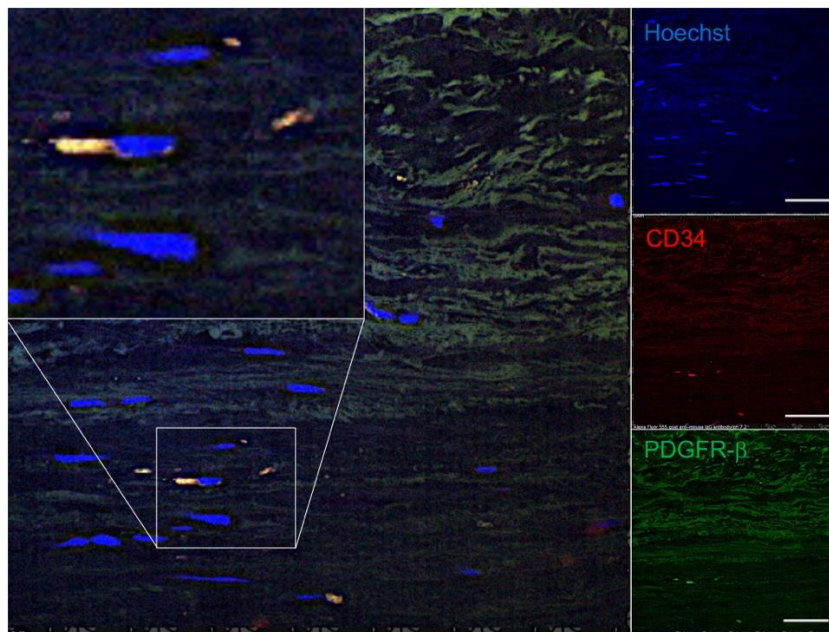

B

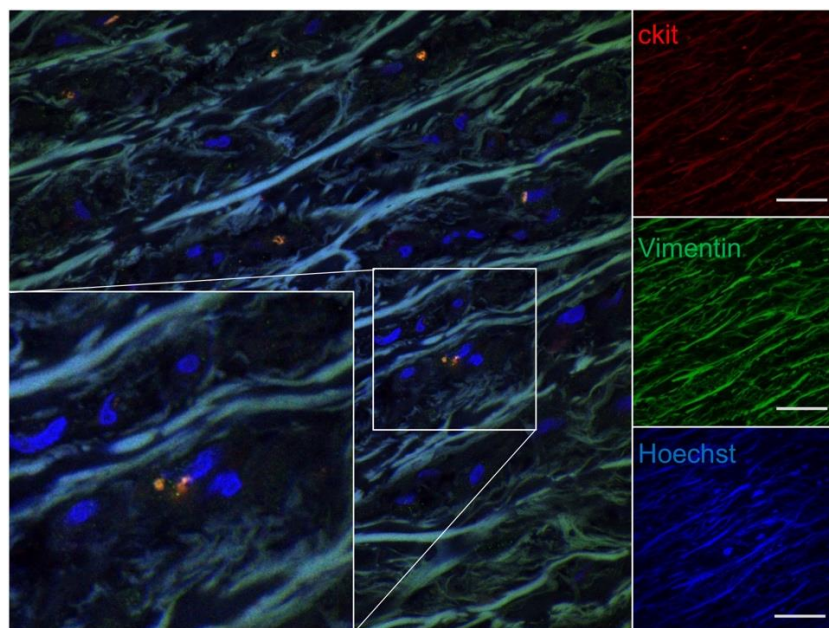

**Supplemental Figure S1. CD34, ckit, vimentin and PDGFR-β staining confirmed aortic TC in TAA.** Double staining of well-known aortic TC markers in (A) CD34 (red) and PDGFR-β (green), and (B) ckit (red) and vimentin (green), were done to identified TC specificity. Scalebar, 50 μm.

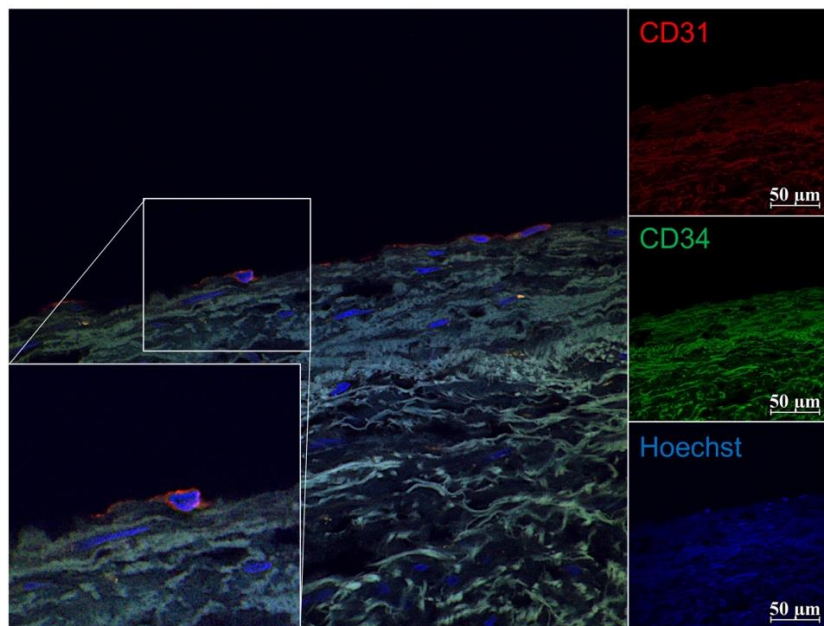**Supplemental Figure S2. Validation of TC specificity by CD34/CD31 double staining.**

CD34 negative and CD31 positive immunostaining were also described for vasa vasorum or endothelial cell population and should be distinct from aortic TCs. The lack of endothelial marker CD31 were performed to validate aortic TC specificity. Red, CD31; green, CD34; blue, nuclei (Hoechst). Scalebar, 50 µm.

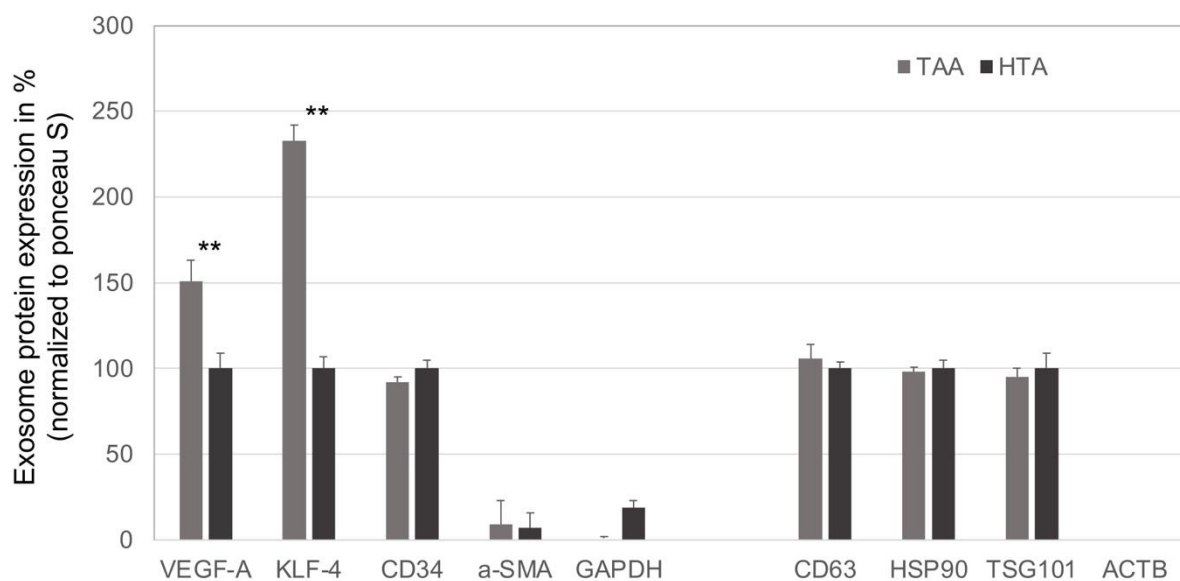

**Supplemental Figure S3. Exosome-specific soluble factors VEGF and KLF-4 were increased in exosomes derived from TAA-TCs (gray bars) compared to HTA-TCs (black bars) samples.** Soluble factors VEGF-A, KLF-4, CD34 and  $\alpha$ -SMA, as well as surface proteins, CD63, HSP90 and TSG101, were analyzed by Western Blot (Figure 2H-I). ACTB and GAPDH were used as loading control. S-Figure 1 shows statistical calculation of protein expression after normalization to ponceau S signals. \*\*,  $p < 0.01$ . Data are mean  $\pm$  SD of three independent experiments.
